# Supplementary material for: Plant microbiome-dependent immune enhancing action of Echinacea purpurea is enhanced by soil organic matter content
Source: PubMed Central journal article supplement (PMC6333828; doi:10.1038/s41598-018-36907-x), 2019-01-15
Supplement: 41598_2018_36907_MOESM1_ESM.pdf [file 41598_2018_36907_MOESM1_ESM.pdf]

## Supplementary Information

Title of the manuscript:

**Plant microbiome-dependent immune enhancing action of *Echinacea purpurea* is enhanced by soil organic matter content**

Author list:

Mona H. Haron, Heather L. Tyler, Suman Chandra, Rita M. Moraes, Colin R. Jackson, Nirmal D. Pugh, David S. Pasco

**Supplementary Table S1.** Analysis of community similarity (as assessed based on presence-absence of bacterial OTUs, Jaccard, or relative abundance of OTUs, theta) among the different cultivation conditions tested using ANOSIM. Percent organic matter in soil T1 (67.5%) – T2 (23.2%) – T3 (10.4%) – T4 (5.6%) – T5 (2.5%), soil nitrogen fertilization T1 (200 Kg/h) – T2 (150 Kg/h) – T3 (100 Kg/h) – T4 (50 Kg/h) – T5 (0 Kg/h) and soil moisture field capacity T1 (full field) – T2 (3/4 of field) – T3 (1/2 field).

| Plant part    | Soil condition   | p value |       | Jaccard Pairwise p value |          |          |          |
|---------------|------------------|---------|-------|--------------------------|----------|----------|----------|
|               |                  | Jaccard | Theta | T1 vs T5                 | T1 vs T4 | T2 vs T5 | T2 vs T3 |
| <b>Root</b>   | Organic matter   | <0.001* | 0.051 | 0.001*                   | 0.007    | 0.012    | -        |
|               | Nitrogen         | 0.098   | 0.409 | -                        | -        | -        | -        |
|               | Moisture content | 0.477   | 0.333 | -                        | -        | -        | -        |
| <b>Aerial</b> | Organic matter   | <0.001* | 0.17  | 0.003*                   | 0.029    | 0.007    | -        |
|               | Nitrogen         | 0.079   | 0.834 | -                        | -        | -        | -        |
|               | Moisture content | 0.009*  | 0.787 | -                        | -        | -        | 0.009    |

\* Statistically significant difference among treatments in each condition using an alpha of 0.05.
